# Supplementary material for: Formation of a cationic alkylidene complex via formal hydride abstraction: synthesis and structural characterization of [W(PMe3)4(η2-CHPMe2)H]X (X = Br, I)
Source: Royal Society of Chemistry journal article supplement (doi:10.1039/c1cc15457e), 2011-01-01
Supplement: c1cc15457e.pdf [file c1cc15457e.pdf]

## SUPPORTING INFORMATION

### Formation of a Cationic Alkylidene Complex *via* Formal Hydride

#### Abstraction: Synthesis and Structural Characterization of

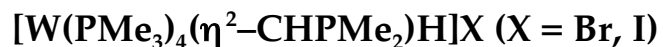

Aaron Sattler and Gerard Parkin,\*

*Department of Chemistry,*

*Columbia University,*

*New York, New York 10027, USA.*

*Received xxxx xx, 2011.*

---

## EXPERIMENTAL SECTION

### General Considerations

All manipulations were performed using a combination of glovebox, high vacuum, and Schlenk techniques under an argon atmosphere unless otherwise specified.<sup>1</sup> Solvents were purified and degassed by standard procedures. <sup>1</sup>H NMR spectra were measured on Bruker 300 DRX, Bruker 300 DPX, Bruker 400 Avance III, Bruker 400 Cyber-enabled Avance III, and Bruker 500 DMX spectrometers. <sup>1</sup>H chemical shifts are reported in ppm relative to SiMe<sub>4</sub> ( $\delta = 0$ ) and were referenced internally with respect to the protio solvent impurity ( $\delta$  7.16 for C<sub>6</sub>D<sub>5</sub>H;  $\delta$  3.31 for CD<sub>2</sub>HOD, and  $\delta$  4.79 for HDO).<sup>2</sup> <sup>13</sup>C NMR spectra are reported in ppm relative to SiMe<sub>4</sub> ( $\delta = 0$ ) and were referenced internally with respect to the solvent ( $\delta$  49.99 for CD<sub>3</sub>OD).<sup>2</sup> <sup>31</sup>P chemical shifts are reported in ppm relative to 85% H<sub>3</sub>PO<sub>4</sub> ( $\delta = 0$ ) and were referenced using P(OMe)<sub>3</sub> ( $\delta = 141.0$ ) as an external standard.<sup>3</sup> Coupling constants are given in hertz. W(PMe<sub>3</sub>)<sub>4</sub>( $\eta^2$ -CH<sub>2</sub>PMe<sub>2</sub>)H was prepared by the literature method.<sup>4</sup> LiAlD<sub>4</sub> was purchased commercially (Aldrich).

### X-ray structure determinations

X-ray diffraction data were collected on a Bruker Apex II diffractometer. Crystal data, data collection and refinement parameters are summarized in Table 2. The structures were solved using direct methods and standard difference map techniques, and were refined by full-matrix least-squares procedures on  $F^2$  with SHELXTL (Version 6.10).<sup>5</sup>

### Computational Details

Calculations were carried out using DFT as implemented in the Jaguar 7.5 (release 2007) suite of *ab initio* quantum chemistry programs.<sup>6</sup> Geometry optimizations were performed with the B3LYP density functional<sup>7</sup> using the 6-31G\*\* (C, H, and P) and LACVP (W) basis sets.<sup>8</sup> The energies of the optimized structures were reevaluated by additional single point calculations on each optimized geometry using cc-pVTZ(-f) correlation consistent triple- $\zeta$  basis set for C, H, and P and LACV3P for W (Table 3).

Molecular orbital analyses were performed with the aid of JIMP2,<sup>9</sup> which employs Fenske-Hall calculations and visualization using MOPLOT.<sup>10</sup>

### Synthesis of $[\text{W}(\text{PMe}_3)_4(\eta^2\text{-CHPMe}_2)\text{H}]\text{I}$

A solution of  $\text{W}(\text{PMe}_3)_4(\eta^2\text{-CH}_2\text{PMe}_2)\text{H}$  (200 mg, 0.35 mmol) in benzene (3 mL) was treated with iodobenzene (145 mg, 0.71 mmol) giving rise to a dark yellow solution.

The solution was allowed to stand overnight at room temperature, thereby depositing bright blue-purple crystals of  $[\text{W}(\text{PMe}_3)_4(\eta^2\text{-CHPMe}_2)\text{H}]\text{I}$ , together with colorless crystals of  $[\text{Me}_3\text{PPh}]\text{I}$ , as identified by comparison of the unit cell data with that of the literature [ $a = 24.831(6)$  Å,  $b = 7.399(2)$  Å,  $c = 12.782(3)$  Å;  $\alpha = 90^\circ$ ,  $\beta = 90^\circ$ ,  $\gamma = 90^\circ$ ].<sup>11,12</sup>

The mother liquor was decanted in air and the crystals were washed sequentially with pentane ( $3 \times 5$  mL),  $\text{Et}_2\text{O}$  ( $2 \times 5$  mL), and distilled water ( $3 \times 5$  mL) to remove the colorless crystals of  $[\text{Me}_3\text{PPh}]\text{I}$ . The sample was then washed with  $\text{Et}_2\text{O}$  ( $2 \times 5$  mL) and pentane ( $2 \times 5$  mL) and dried *in vacuo* to give blue-purple crystals of  $[\text{W}(\text{PMe}_3)_4(\eta^2\text{-CHPMe}_2)\text{H}]\text{I}$  suitable for X-ray diffraction (120 mg, 49% yield). Anal. Calcd.: C, 26.1%, H, 6.4%. Found: C, 25.6%, H, 5.8%.

<sup>1</sup>H NMR ( $\text{CD}_3\text{OD}$ ): 1.32 [ddquint,  $J_{\text{H-H}} = 12$ ,  $J_{\text{P-H}} = 16$ ,  $^2J_{\text{P-H}} = 37$ ,  $^1J_{\text{W-H}} = 29$ , 1H of  $\text{W}(\text{PMe}_3)_4(\eta^2\text{-CHPMe}_2)\underline{\text{H}}$ ], 1.60 [d,  $^2J_{\text{P-H}} = 10$ , 6H of  $\text{W}(\text{PMe}_3)_4(\eta^2\text{-CHPMe}_2)\text{H}$ ], 1.68 [s, 36H of  $\text{W}(\text{PMe}_3)_4(\eta^2\text{-CHPMe}_2)\text{H}$ ], 11.86 [dq,  $J_{\text{H-H}} = 12$ ,  $J_{\text{P-H}} = 11$ ,  $J_{\text{W-H}} = 11$ , 1H of  $\text{W}(\text{PMe}_3)_4(\eta^2\text{-CHPMe}_2)\underline{\text{H}}$ ]. <sup>31</sup>P{<sup>1</sup>H} NMR ( $\text{CD}_3\text{OD}$ ): -154.0 [quint,  $^2J_{\text{P-P}} = 12$ ,  $^1J_{\text{W-P}} = 81$ , 1P of  $\text{W}(\text{PMe}_3)_4(\eta^2\text{-CHPMe}_2)\text{H}$ ], -34.9 [d,  $^2J_{\text{P-P}} = 12$ ,  $^1J_{\text{W-P}} = 204$ , 4P of  $\text{W}(\text{PMe}_3)_4(\eta^2\text{-CHPMe}_2)\text{H}$ ]. <sup>13</sup>C{<sup>1</sup>H} NMR ( $\text{CD}_3\text{OD}$ ): 19.2 [d,  $^1J_{\text{P-C}} = 27$ , 2C of  $\text{W}(\text{PMe}_3)_4(\eta^2\text{-CHPMe}_2)\text{H}$ ], 26.9 [m, 12C of  $\text{W}(\text{PMe}_3)_4(\eta^2\text{-CHPMe}_2)\text{H}$ ], 224.4 [dq,  $^1J_{\text{P-C}} = 51$ ,  $J_{\text{P-C}} = 13$ , 1C of  $\text{W}(\text{PMe}_3)_4(\eta^2\text{-CHPMe}_2)\underline{\text{H}}$ ].

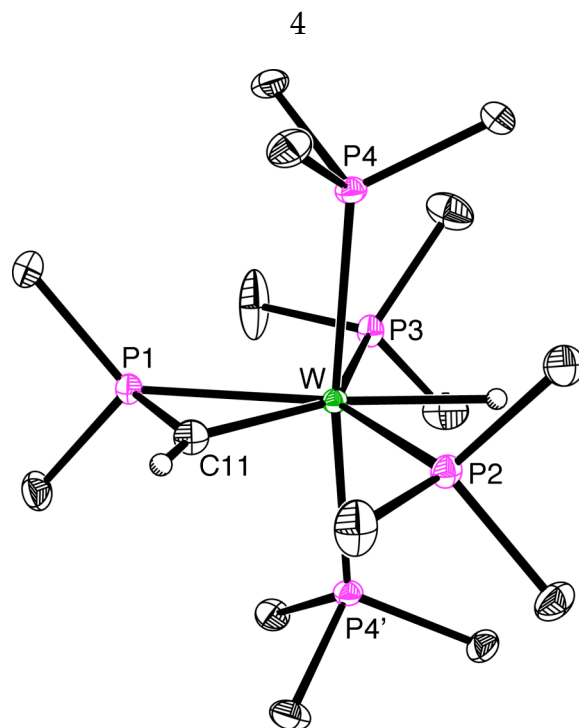

*Molecular Structure of [W(PMe<sub>3</sub>)<sub>4</sub>(η<sup>2</sup>-CHPMe<sub>2</sub>)H]I (iodide counterion not shown)*

### Synthesis of [W(PMe<sub>3</sub>)<sub>4</sub>(η<sup>2</sup>-CHPMe<sub>2</sub>)H]Br

A solution of W(PMe<sub>3</sub>)<sub>4</sub>(η<sup>2</sup>-CH<sub>2</sub>PMe<sub>2</sub>)H (400 mg, 0.71 mmol) in benzene (5 mL) was treated with bromobenzene (250 mg, 1.60 mmol) giving rise to a dark yellow solution. The solution was allowed to stand overnight at room temperature, thereby depositing bright blue-purple crystals of [W(PMe<sub>3</sub>)<sub>4</sub>(η<sup>2</sup>-CHPMe<sub>2</sub>)H]Br, together with some colorless crystals (presumably [Me<sub>3</sub>PPh]Br, *vide supra*). The mother liquor was decanted in air, and the crystals were washed sequentially with pentane (3 × 5 mL), Et<sub>2</sub>O (2 × 5 mL), and pentane (2 × 5 mL) and dried *in vacuo* to give blue-purple crystals of [W(PMe<sub>3</sub>)<sub>4</sub>(η<sup>2</sup>-CHPMe<sub>2</sub>)H]Br suitable for X-ray diffraction (260 mg, 57% yield). <sup>1</sup>H NMR (CD<sub>3</sub>OD): 1.32 [ddquint, J<sub>H-H</sub> = 13, J<sub>P-H</sub> = 16, <sup>2</sup>J<sub>P-H</sub> = 37, <sup>1</sup>J<sub>W-H</sub> = 29, 1H of W(PMe<sub>3</sub>)<sub>4</sub>(η<sup>2</sup>-CHPMe<sub>2</sub>)H], 1.59 [d, <sup>2</sup>J<sub>P-H</sub> = 9, 6H of W(PMe<sub>3</sub>)<sub>4</sub>(η<sup>2</sup>-CHPMe<sub>2</sub>)H], 1.67 [s, 36H of W(PMe<sub>3</sub>)<sub>4</sub>(η<sup>2</sup>-CHPMe<sub>2</sub>)H], 11.85 [dq, J<sub>H-H</sub> = 13, J<sub>P-H</sub> = 10, J<sub>W-H</sub> = 11, <sup>1</sup>J<sub>C-H</sub> = 174, 1H of W(PMe<sub>3</sub>)<sub>4</sub>(η<sup>2</sup>-CHPMe<sub>2</sub>)H]. <sup>31</sup>P{<sup>1</sup>H} NMR (CD<sub>3</sub>OD): -153.8 [quint, <sup>2</sup>J<sub>P-P</sub> = 12, <sup>1</sup>J<sub>W-P</sub> = 82, 1P of W(PMe<sub>3</sub>)<sub>4</sub>(η<sup>2</sup>-CHPMe<sub>2</sub>)H], -34.7 [d, <sup>2</sup>J<sub>P-P</sub> = 12, <sup>1</sup>J<sub>W-P</sub> = 204, 4P of W(PMe<sub>3</sub>)<sub>4</sub>(η<sup>2</sup>-CHPMe<sub>2</sub>)H]. <sup>13</sup>C{<sup>1</sup>H} NMR (CD<sub>3</sub>OD): 19.2 [dq, <sup>1</sup>J<sub>P-C</sub> = 27, <sup>3</sup>J<sub>P-C</sub> = 2, 2C of W(PMe<sub>3</sub>)<sub>4</sub>(η<sup>2</sup>-CHPMe<sub>2</sub>)H], 26.9 [m, 12C of W(PMe<sub>3</sub>)<sub>4</sub>(η<sup>2</sup>-CHPMe<sub>2</sub>)H], 224.4 [dq, <sup>1</sup>J<sub>P-C</sub> = 50, <sup>2</sup>J<sub>P-C</sub> = 13,

1C of  $W(PMe_3)_4(\eta^2\text{-CHPMe}_2)H$ .  $^{13}C$  NMR ( $CD_3OD$ ): 19.2 [dq,  $^1J_{P-C} = 27$ ,  $^1J_{H-C} = 129$ , 2C of  $W(PMe_3)_4(\eta^2\text{-CHPMe}_2)H$ ], 26.9 [q,  $^1J_{H-C} = 132$ , 12C of  $W(PMe_3)_4(\eta^2\text{-CHPMe}_2)H$ ], 224.4 [dd,  $^1J_{P-C} = 50$ ,  $^1J_{H-C} = 174$ , 1C of  $W(PMe_3)_4(\eta^2\text{-CHPMe}_2)H$ ].  $^1H$  NMR ( $D_2O$ ): 0.23 [m, 1H of  $W(PMe_3)_4(\eta^2\text{-CHPMe}_2)H$ ], 1.56 [d,  $^2J_{P-H} = 10$ , 6H of  $W(PMe_3)_4(\eta^2\text{-CHPMe}_2)H$ ], 1.62 [s, 36H of  $W(PMe_3)_4(\eta^2\text{-CHPMe}_2)H$ ], 12.01 [sextet,  $J_{P-H} = 11$ ,  $J_{H-H} = 11$ ,  $J_{W-H} = 11$ , 1H of  $W(PMe_3)_4(\eta^2\text{-CHPMe}_2)H$ ].  $^{31}P\{^1H\}$  NMR ( $D_2O$ ): -154.6 [quint,  $^2J_{P-P} = 12$ ,  $^1J_{W-P} = 84$ , 1P of  $W(PMe_3)_4(\eta^2\text{-CHPMe}_2)H$ ], -35.7 [d,  $^2J_{P-P} = 12$ ,  $^1J_{W-P} = 203$ , 4P of  $W(PMe_3)_4(\eta^2\text{-CHPMe}_2)H$ ].

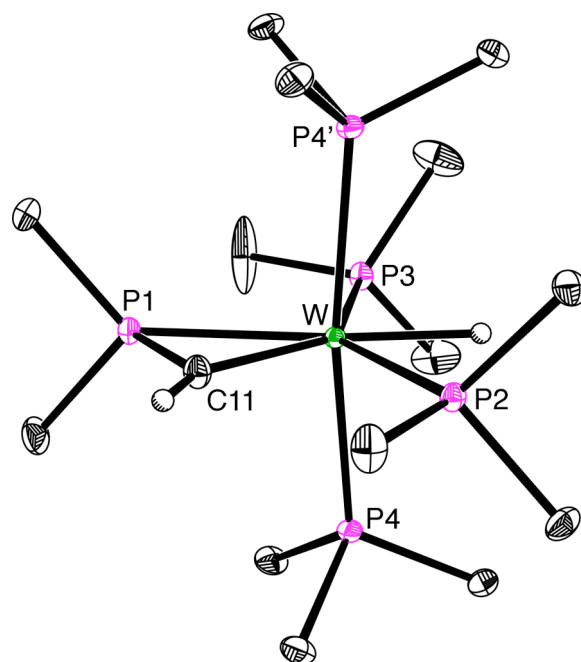

*Molecular Structure of  $[W(PMe_3)_4(\eta^2\text{-CHPMe}_2)H]Br$  (bromide counterion not shown)*

### Reaction of $W(PMe_3)_4(\eta^2\text{-CH}_2PMe_2)H$ with bromotoluene

A solution of  $W(PMe_3)_4(\eta^2\text{-CH}_2PMe_2)H$  (60 mg, 0.11 mmol) in  $C_6D_6$  (ca. 0.7 mL) was treated with *p*-bromotoluene (40 mg, 0.23 mmol) and allowed to stand at room temperature for 12 hours. After this period, the mixture was filtered, removing *inter alia* purple crystals of  $[W(PMe_3)_4(\eta^2\text{-CHPMe}_2)H]Br$ , and the filtrate was analyzed by  $^1H$  NMR spectroscopy, thereby demonstrating the formation of toluene.

#### Reaction of $[\text{W}(\text{PMe}_3)_4(\eta^2\text{-CHPMe}_2)\text{H}]\text{Br}$ with $\text{LiAlH}_4$

A suspension of  $[\text{W}(\text{PMe}_3)_4(\eta^2\text{-CHPMe}_2)\text{H}]\text{Br}$  (12 mg, 0.02 mmol) in  $\text{C}_6\text{D}_6$  (ca. 0.7 mL) was treated with  $\text{LiAlH}_4$  (10 mg, 0.26 mmol).  $\text{Et}_2\text{O}$  (ca. 0.1 mL) was then added, thereby resulting in the formation of a bright yellow solution. The mixture was filtered and the filtrate was lyophilized and the solid obtained was extracted into  $\text{C}_6\text{D}_6$  and analyzed by  $^1\text{H}$  NMR spectroscopy, thereby demonstrating the formation of  $\text{W}(\text{PMe}_3)_4(\eta^2\text{-CH}_2\text{PMe}_2)\text{H}$ .

#### Reaction of $[\text{W}(\text{PMe}_3)_4(\eta^2\text{-CHPMe}_2)\text{H}]\text{Br}$ with $\text{LiAlD}_4$

A suspension of  $[\text{W}(\text{PMe}_3)_4(\eta^2\text{-CHPMe}_2)\text{H}]\text{Br}$  (50 mg, 0.08 mmol) in benzene (1 mL) was treated with a solution of  $\text{LiAlD}_4$  (3 mg, 0.07 mmol) in  $\text{Et}_2\text{O}$  (ca. 0.2 mL). The resulting mixture was shaken for 1 minute and filtered. The filtrate was lyophilized and the yellow powder was extracted into  $\text{C}_6\text{D}_6$  (ca. 0.7 mL) and analyzed by  $^1\text{H}$  NMR spectroscopy, thereby demonstrating the formation of an isotopologue of  $\text{W}(\text{PMe}_3)_4(\eta^2\text{-CH}_2\text{PMe}_2)\text{H}$  in which deuterium primarily resided in the methylene site, namely  $\text{W}(\text{PMe}_3)_4(\eta^2\text{-CHDPMe}_2)\text{H}$ .

## Crystal Structure and Molecular Orbital Analysis of $W(PMe_3)_4(\eta^2-CH_2PMe_2)H$

Crystals of  $W(PMe_3)_4(\eta^2-CH_2PMe_2)H$  suitable for X-ray diffraction were obtained from a solution in pentane at  $-15\text{ }^\circ\text{C}$ .

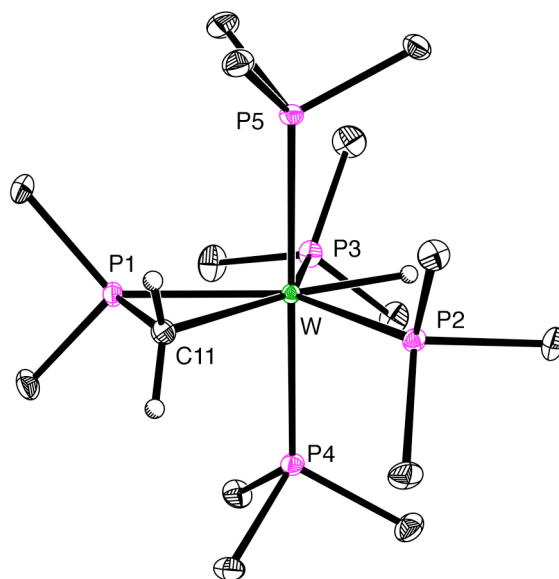

*Molecular Structure of  $W(PMe_3)_4(\eta^2-CH_2PMe_2)H$*

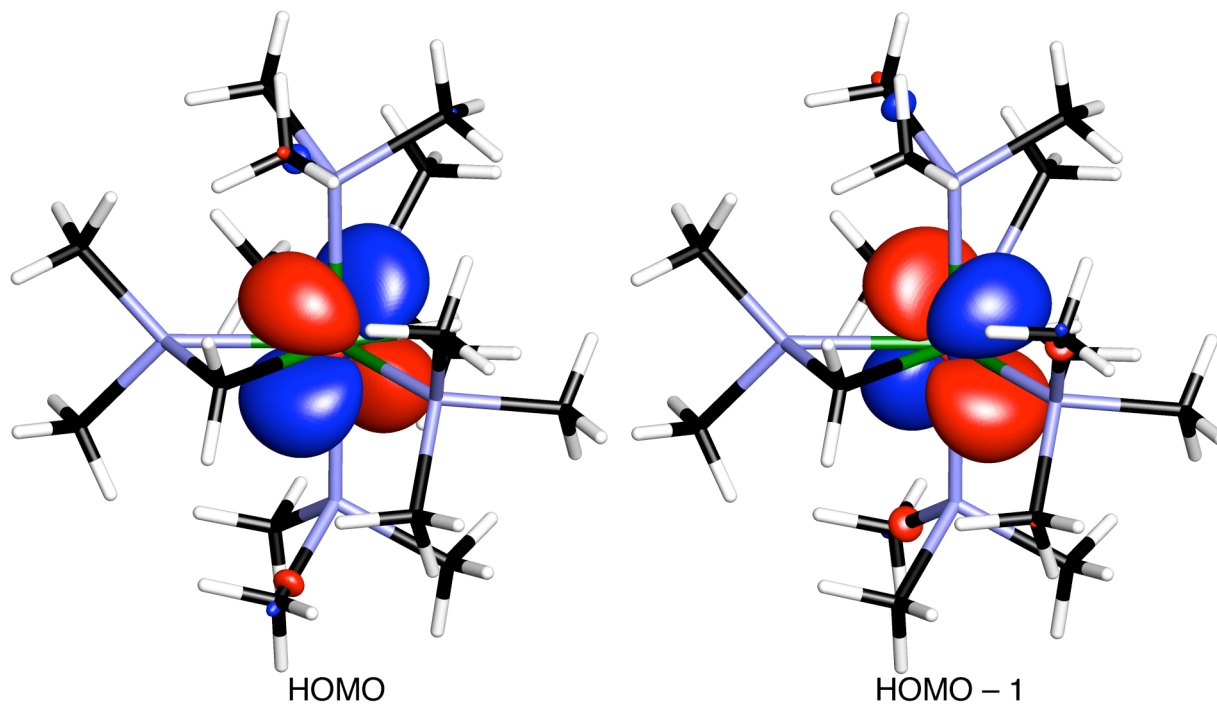

*The highest occupied molecular orbitals of  $W(PMe_3)_4(\eta^2-CH_2PMe_2)H$  indicate a  $d^4$  configuration*

### **Kinetics of isomerization of $W(PMe_3)_4(\eta^2-CHDPM_2)H$**

A suspension of  $[W(PMe_3)_4(\eta^2-CHPMe_2)H]Br$  (100 mg, 0.16 mmol) in benzene (1 mL) was treated with a solution of  $LiAlD_4$  (5 mg, 0.12 mmol) in  $Et_2O$  (*ca.* 0.2 mL). The resulting mixture was shaken for 1 minute and filtered. The filtrate was lyophilized and the yellow powder of  $W(PMe_3)_4(\eta^2-CHDPM_2)H$  obtained was extracted into  $C_6D_6$  (*ca.* 2.1 mL) and filtered into a vial. Mesitylene (1  $\mu$ L) was added as an internal integration standard, and the solution was divided evenly into 3 NMR tubes equipped with J. Young valves. Two of the samples were treated with  $PMe_3$  and the kinetics of the isomerization of  $W(PMe_3)_4(\eta^2-CHDPM_2)H$  were measured at 30°C by monitoring the increase in intensity of the methylene signal in the  $^1H$  NMR spectrum. Using a similar procedure, the kinetics were also measured at 53°C and 64°C in the probe of the NMR spectrometer, as summarized in Table 1. Within experimental error, the rate constant data are not influenced by the presence of  $PMe_3$ .



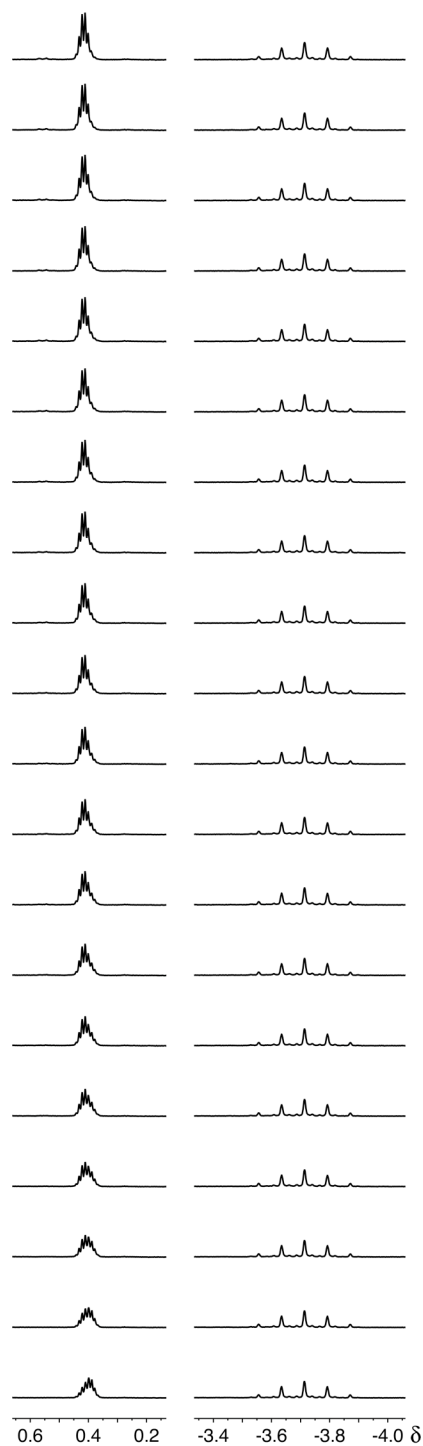

*NMR spectra for isomerization of  $W(PMe_3)_4(\eta^2-CHDPMe_2)H$  at 53 °C.*

The methylene signal is on the left, and the hydride is on the right. The first spectrum is at the bottom and subsequent spectra were recorded every 1.59 minutes, with only every 5<sup>th</sup> spectrum being shown. In addition to the methylene signal growing in intensity, the shape of the signal changes because the [CHD] and [CH<sub>2</sub>] groups have slightly different chemical shifts.

**Table 1.** Rate constant data ( $k_1$ ) for isomerization of  $W(PMe_3)_4(\eta^2\text{-CHDPMe}_2)H$ .<sup>a</sup>

| Temperature/°C | [PMe <sub>3</sub> ]/mM | $k_1/s^{-1}$                         |
|----------------|------------------------|--------------------------------------|
| 30             | –                      | $1.6(5) \times 10^{-5}$              |
| 30             | 1.9                    | $2.0(2) \times 10^{-5}$ <sup>b</sup> |
| 30             | 9.4                    | $1.3(4) \times 10^{-5}$              |
| 53             | –                      | $2.08(8) \times 10^{-4}$             |
| 64             | –                      | $9.9(5) \times 10^{-4}$              |

(a) Activation parameters:  $\Delta H^\ddagger = 24(2)$  kcal mol<sup>-1</sup>;  $\Delta S^\ddagger = -3(6)$  cal mol<sup>-1</sup> K<sup>-1</sup>.

(b) The hydride signal of  $d_1$ - $W(PMe_3)_4(\eta^4\text{-CH}_2\text{PMe}_2)H$ , rather than that of mesitylene, was used as the integration standard due to a small amount of decomposition during this experiment. In this regard, although deuterium is incorporated into the hydride site during the course of the reaction, the statistical variation in its intensity (from 1.00 to 0.98) is small compared to other sources of error in the experiment. Thus, any error introduced by using the hydride signal is considered to be negligible.

### Reaction of $W(PMe_3)_4(\eta^2\text{-CHDPMe}_2)H$ towards bromotoluene

A sample of  $W(PMe_3)_4(\eta^2\text{-CHDPMe}_2)H$  was prepared by the above procedure employing  $[W(PMe_3)_4(\eta^2\text{-CHPMe}_2)H]Br$  (200 mg, 0.31 mmol), benzene (1.5 mL) and a solution of  $LiAlD_4$  (10 mg, 0.24 mmol) in  $Et_2O$  (ca. 0.4 mL). The resulting mixture was shaken for 1 minute and then filtered. The precipitate was extracted with benzene (1 mL), filtered and the filtrates were combined and lyophilized. The bright yellow powder was then extracted with  $d_6$ -benzene (ca. 0.7 mL), filtered into an NMR tube equipped with a J. Young valve and treated with *p*-bromotoluene (150 mg, 0.88 mmol). The sample was monitored by <sup>1</sup>H NMR spectroscopy, which demonstrated that the toluene formed contained ca 40% deuterium in the *para* position.

**Table 2.** Crystal, intensity collection and refinement data.

|                                         | $[\text{W}(\text{PMe}_3)_4(\eta^2\text{-CHPMe}_2)\text{H}]\text{I}$ | $[\text{W}(\text{PMe}_3)_4(\eta^2\text{-CHPMe}_2)\text{H}]\text{Br}$ |
|-----------------------------------------|---------------------------------------------------------------------|----------------------------------------------------------------------|
| lattice                                 | Tetragonal                                                          | Tetragonal                                                           |
| formula                                 | $\text{C}_{15}\text{H}_{44}\text{IP}_5\text{W}$                     | $\text{C}_{15}\text{H}_{44}\text{BrP}_5\text{W}$                     |
| formula weight                          | 690.10                                                              | 643.11                                                               |
| space group                             | $P4_2/m$                                                            | $P4_2/m$                                                             |
| $a/\text{\AA}$                          | 13.598(3)                                                           | 13.476(3)                                                            |
| $b/\text{\AA}$                          | 13.598(3)                                                           | 13.476(3)                                                            |
| $c/\text{\AA}$                          | 14.392(3)                                                           | 14.118(4)                                                            |
| $\alpha/^\circ$                         | 90                                                                  | 90                                                                   |
| $\beta/^\circ$                          | 90                                                                  | 90                                                                   |
| $\gamma/^\circ$                         | 90                                                                  | 90                                                                   |
| $V/\text{\AA}^3$                        | 2661.3(11)                                                          | 2563.8(11)                                                           |
| $Z$                                     | 4                                                                   | 4                                                                    |
| temperature (K)                         | 150(2)                                                              | 125(2)                                                               |
| radiation ( $\lambda$ , $\text{\AA}$ )  | 0.71073                                                             | 0.71073                                                              |
| $\rho$ (calcd.) $\text{g cm}^{-3}$      | 1.722                                                               | 1.666                                                                |
| $\mu$ (Mo $K\alpha$ ), $\text{mm}^{-1}$ | 5.799                                                               | 6.373                                                                |
| $\theta$ max, deg.                      | 31.50                                                               | 31.76                                                                |
| no. of data collected                   | 45502                                                               | 44100                                                                |
| no. of data                             | 4582                                                                | 4516                                                                 |
| no. of parameters                       | 125                                                                 | 124                                                                  |
| $R_1 [I > 2\sigma(I)]$                  | 0.0220                                                              | 0.0188                                                               |
| $wR_2 [I > 2\sigma(I)]$                 | 0.0469                                                              | 0.0410                                                               |
| $R_1$ [all data]                        | 0.0295                                                              | 0.0261                                                               |
| $wR_2$ [all data]                       | 0.0497                                                              | 0.0433                                                               |
| GOF                                     | 1.054                                                               | 1.042                                                                |

**Table 2 (cont).** Crystal, intensity collection and refinement data.

| <b>W(PMe<sub>3</sub>)<sub>4</sub>(η<sup>2</sup>-CH<sub>2</sub>PMe<sub>2</sub>)H</b> |                                                  |
|-------------------------------------------------------------------------------------|--------------------------------------------------|
| lattice                                                                             | Monoclinic                                       |
| formula                                                                             | C <sub>15</sub> H <sub>45</sub> P <sub>5</sub> W |
| formula weight                                                                      | 564.21                                           |
| space group                                                                         | <i>P</i> 2 <sub>1</sub> / <i>n</i>               |
| <i>a</i> /Å                                                                         | 14.8321(4)                                       |
| <i>b</i> /Å                                                                         | 9.4806(3)                                        |
| <i>c</i> /Å                                                                         | 18.0198(5)                                       |
| $\alpha$ /°                                                                         | 90                                               |
| $\beta$ /°                                                                          | 106.6870(10)                                     |
| $\gamma$ /°                                                                         | 90                                               |
| <i>V</i> /Å <sup>3</sup>                                                            | 2427.19(12)                                      |
| <i>Z</i>                                                                            | 4                                                |
| temperature (K)                                                                     | 125(2)                                           |
| radiation ( $\lambda$ , Å)                                                          | 0.71073                                          |
| $\rho$ (calcd.) g cm <sup>-3</sup>                                                  | 1.544                                            |
| $\mu$ (Mo K $\alpha$ ), mm <sup>-1</sup>                                            | 5.084                                            |
| $\theta$ max, deg.                                                                  | 30.51                                            |
| no. of data collected                                                               | 14235                                            |
| no. of data                                                                         | 7349                                             |
| no. of parameters                                                                   | 208                                              |
| <i>R</i> <sub>1</sub> [ <i>I</i> > 2 $\sigma$ ( <i>I</i> )]                         | 0.0208                                           |
| <i>wR</i> <sub>2</sub> [ <i>I</i> > 2 $\sigma$ ( <i>I</i> )]                        | 0.0461                                           |
| <i>R</i> <sub>1</sub> [all data]                                                    | 0.0259                                           |
| <i>wR</i> <sub>2</sub> [all data]                                                   | 0.0478                                           |
| GOF                                                                                 | 1.011                                            |

**Table 3.** Cartesian Coordinates and Single Point Energies for Geometry Optimized Structures (Energies in parentheses correspond to the basis set used for geometry optimization).

| <b>W(PMe<sub>3</sub>)<sub>4</sub>(η<sup>2</sup>-CHPMe<sub>2</sub>)H<sup>+</sup></b> |              |              |              |  |
|-------------------------------------------------------------------------------------|--------------|--------------|--------------|--|
| -2372.97560102073 Hartrees                                                          |              |              |              |  |
| (-2372.62930166812 Hartrees)                                                        |              |              |              |  |
| <b>atom</b>                                                                         | <b>x</b>     | <b>y</b>     | <b>z</b>     |  |
| W                                                                                   | 0.164082868  | -0.089603817 | -0.167022673 |  |
| H                                                                                   | -1.239494374 | -0.024419274 | 0.910893201  |  |
| P                                                                                   | 1.980306506  | -0.675512003 | -1.814177339 |  |
| P                                                                                   | -0.078439617 | 2.053727985  | 1.124539735  |  |
| P                                                                                   | -1.103831833 | -2.378419567 | -0.418658167 |  |
| P                                                                                   | -1.378158841 | 0.831860353  | -2.004413818 |  |
| C                                                                                   | 1.76355099   | 0.811925229  | -0.880554604 |  |
| C                                                                                   | 2.101872875  | -0.341239712 | -3.64014632  |  |
| C                                                                                   | 1.195072857  | 3.380049798  | 0.88182646   |  |
| H                                                                                   | 0.96104997   | 4.247829479  | 1.505365651  |  |
| H                                                                                   | 1.222066085  | 3.696474019  | -0.163836014 |  |
| H                                                                                   | 2.187216435  | 3.010651846  | 1.152742405  |  |
| C                                                                                   | -1.631359594 | 3.056272261  | 0.926037913  |  |
| C                                                                                   | -0.380538369 | -3.59852926  | -1.605518973 |  |
| H                                                                                   | -0.978123357 | -4.514649888 | -1.643701081 |  |
| H                                                                                   | 0.638608566  | -3.846395543 | -1.299163154 |  |
| H                                                                                   | -0.336015734 | -3.15609425  | -2.603556765 |  |
| C                                                                                   | -1.36146638  | -3.421858669 | 1.095881622  |  |
| C                                                                                   | -3.16629139  | 1.191429284  | -1.659571286 |  |
| C                                                                                   | -1.573581972 | -0.114239939 | -3.598372455 |  |

|   |              |              |              |
|---|--------------|--------------|--------------|
| C | -0.805697071 | 2.446770096  | -2.717542157 |
| P | 1.436058872  | -1.137067256 | 1.803820091  |
| C | 3.656571974  | -1.432678716 | -1.536196701 |
| C | -0.126370997 | 1.986833031  | 2.981633239  |
| C | -2.887600773 | -2.347721055 | -0.934663593 |
| C | 0.588871083  | -1.44879818  | 3.425573318  |
| C | 2.267170636  | -2.791267447 | 1.588904273  |
| C | 2.920087372  | -0.159776348 | 2.339768252  |
| H | -1.932650773 | -2.848082182 | 1.830318055  |
| H | -1.931915686 | -4.318078438 | 0.833340313  |
| H | -0.422567081 | -3.735701455 | 1.549835591  |
| H | -3.028221271 | -1.907196883 | -1.920706851 |
| H | -3.283272315 | -3.367803564 | -0.955075712 |
| H | -3.458442077 | -1.766899136 | -0.205499885 |
| H | 2.993486896  | -2.751799225 | 0.777071322  |
| H | 2.788551121  | -3.071890934 | 2.509432917  |
| H | 1.545232299  | -3.573421633 | 1.350401913  |
| H | -0.208994218 | -2.181957411 | 3.299631347  |
| H | 1.307473706  | -1.837215761 | 4.153908464  |
| H | 0.148103861  | -0.533453779 | 3.817157317  |
| H | 2.633941603  | 0.846473016  | 2.64931827   |
| H | 3.431692163  | -0.654615512 | 3.171379429  |
| H | 3.610936561  | -0.065953324 | 1.498667309  |
| H | 0.799574516  | 1.591161267  | 3.400244606  |
| H | -0.2824426   | 2.990729202  | 3.388010387  |
| H | -0.957775368 | 1.350807204  | 3.295808539  |
| H | 1.332025658  | 0.363002019  | -3.955276843 |
| H | 3.079384547  | 0.089600242  | -3.877523966 |

|   |              |              |              |
|---|--------------|--------------|--------------|
| H | 1.984732536  | -1.267648926 | -4.211178453 |
| H | 3.682602819  | -2.462532755 | -1.90587843  |
| H | 4.420325848  | -0.855851116 | -2.066715478 |
| H | 3.906268113  | -1.435831967 | -0.475324111 |
| H | -2.492517088 | 2.441523899  | 1.199988671  |
| H | -1.600666043 | 3.927607983  | 1.587235059  |
| H | -1.760353097 | 3.410603757  | -0.097243461 |
| H | -2.016713206 | -1.096513991 | -3.428014964 |
| H | -2.218358453 | 0.439582861  | -4.288134975 |
| H | -0.604684877 | -0.265867344 | -4.074402165 |
| H | 0.190790231  | 2.317301329  | -3.146246837 |
| H | -1.490814228 | 2.791737849  | -3.498443581 |
| H | -0.737790126 | 3.212137069  | -1.943000675 |
| H | -3.268767387 | 1.897701797  | -0.837146577 |
| H | -3.641540533 | 1.61307987   | -2.550734897 |
| H | -3.690723424 | 0.274859658  | -1.38598271  |
| H | 2.397221888  | 1.694762605  | -0.886918957 |

**W(PMe<sub>3</sub>)<sub>4</sub>(η<sup>2</sup>-CH<sub>2</sub>PMe<sub>2</sub>)H**

-2373.74059082820 Hartrees

(-2373.38785945076 Hartrees)

| <b>atom</b> | <b>x</b>    | <b>y</b>    | <b>z</b>    |
|-------------|-------------|-------------|-------------|
| W           | 13.60632047 | 1.886785418 | 12.10612604 |
| H           | 12.66065599 | 0.797247755 | 11.08577664 |
| P           | 11.96673674 | 1.759747191 | 13.95212043 |
| P           | 15.24243765 | 2.067398384 | 10.26260918 |
| P           | 11.83827553 | 2.998871653 | 10.74470989 |

|   |             |              |             |
|---|-------------|--------------|-------------|
| P | 14.26106312 | -0.475256407 | 12.57539499 |
| P | 14.63552813 | 3.848056954  | 13.15325075 |
| C | 12.52192716 | 1.54241052   | 15.73779171 |
| H | 11.65946828 | 1.562521849  | 16.41249384 |
| H | 13.20236244 | 2.347467438  | 16.02553763 |
| H | 13.05103403 | 0.600446971  | 15.87787847 |
| C | 10.84248028 | 3.221225339  | 14.32720116 |
| H | 10.15063343 | 2.983238739  | 15.14247556 |
| H | 10.2585387  | 3.519038516  | 13.45596635 |
| H | 11.44797351 | 4.079331773  | 14.62676945 |
| C | 10.65788895 | 0.417972733  | 13.94810914 |
| H | 9.956500543 | 0.524874037  | 14.7835584  |
| H | 11.14138991 | -0.559960756 | 14.02380645 |
| H | 10.10431694 | 0.442273533  | 13.00722514 |
| C | 15.07780004 | 0.944038919  | 8.775475066 |
| H | 15.8984239  | 1.084864416  | 8.062358416 |
| H | 14.12953254 | 1.144805359  | 8.27148082  |
| H | 15.06445272 | -0.09912736  | 9.102400678 |
| C | 15.43769913 | 3.689084095  | 9.330714409 |
| H | 16.05398419 | 3.555297704  | 8.434695983 |
| H | 15.91806715 | 4.430634815  | 9.969645928 |
| H | 14.46847779 | 4.090884209  | 9.033525938 |
| C | 17.08260069 | 1.812012781  | 10.56257559 |
| H | 17.66288477 | 2.102689429  | 9.680311498 |
| H | 17.29612448 | 0.766675542  | 10.7869028  |
| H | 17.42009319 | 2.409029921  | 11.41344195 |
| C | 10.07344902 | 2.394077358  | 10.88908026 |
| H | 9.409810691 | 2.970109929  | 10.23497986 |



|   |             |              |             |
|---|-------------|--------------|-------------|
| H | 9.695758973 | 2.454082318  | 11.90892694 |
| H | 10.05165462 | 1.34500504   | 10.58021931 |
| C | 11.58925888 | 4.836056817  | 10.96128802 |
| H | 10.75232088 | 5.214513322  | 10.36411319 |
| H | 12.50432503 | 5.354634755  | 10.66117116 |
| H | 11.40804296 | 5.058816164  | 12.01534335 |
| C | 11.84955856 | 2.915237488  | 8.875356627 |
| H | 10.9732571  | 3.422579809  | 8.456918836 |
| H | 11.82388857 | 1.863299608  | 8.577246372 |
| H | 12.74683513 | 3.368193454  | 8.452799185 |
| C | 15.92493241 | -1.137417764 | 12.04411561 |
| H | 16.03465086 | -2.187702683 | 12.33443915 |
| H | 16.71749669 | -0.555190177 | 12.52034122 |
| H | 16.03913421 | -1.063616349 | 10.96042305 |
| C | 13.18967814 | -1.81364543  | 11.85703914 |
| H | 13.52696305 | -2.810659261 | 12.16218103 |
| H | 13.21030951 | -1.740129396 | 10.7668599  |
| H | 12.15687043 | -1.664540847 | 12.17918035 |
| C | 14.36289799 | -1.093043952 | 14.33590074 |
| H | 14.79835835 | -2.097275288 | 14.36870881 |
| H | 13.36773905 | -1.137712945 | 14.78285587 |
| H | 14.98352161 | -0.41711856  | 14.92862024 |
| C | 15.28424313 | 2.256297969  | 13.65999122 |
| H | 15.12433908 | 2.010378368  | 14.71291886 |
| H | 16.33088078 | 2.092505194  | 13.3890112  |
| C | 14.10298805 | 4.881744101  | 14.61383155 |
| H | 14.97170068 | 5.197836973  | 15.20104013 |
| H | 13.43194175 | 4.318510102  | 15.26185672 |

|   |             |             |             |
|---|-------------|-------------|-------------|
| H | 13.5738149  | 5.776521413 | 14.26725238 |
| C | 16.01963118 | 4.966363832 | 12.58522621 |
| H | 16.59883599 | 5.317198775 | 13.44568833 |
| H | 15.62072418 | 5.838764603 | 12.05604166 |
| H | 16.69256305 | 4.433498968 | 11.91405939 |

## REFERENCES

- (1) (a) McNally, J. P.; Leong, V. S.; Cooper, N. J. in *Experimental Organometallic Chemistry*, Wayda, A. L.; Darensbourg, M. Y., Eds.; American Chemical Society: Washington, DC, 1987; Chapter 2, pp 6-23.  
(b) Burger, B.J.; Bercaw, J. E. in *Experimental Organometallic Chemistry*; Wayda, A. L.; Darensbourg, M. Y., Eds.; American Chemical Society: Washington, DC, 1987; Chapter 4, pp 79-98.  
(c) Shriver, D. F.; Drezdson, M. A.; *The Manipulation of Air-Sensitive Compounds*, 2<sup>nd</sup> Edition; Wiley-Interscience: New York, 1986.
- (2) (a) Gottlieb, H. E.; Kotlyar, V.; Nudelman, A. J. *Org. Chem.* **1997**, *62*, 7512-7515.  
(b) Reference for methanol and water
- (3) "Nuclear Magnetic Resonance Spectroscopy" Nelson, J. H. Prentice Hall, New Jersey (2003), p 79.
- (4) Green, M. L. H.; Parkin, G.; Chen, M.; Prout, K. J. *Chem. Soc., Dalton Trans.* **1986**, 2227-2236.
- (5) (a) Sheldrick, G. M. SHELXTL, An Integrated System for Solving, Refining and Displaying Crystal Structures from Diffraction Data; University of Göttingen, Göttingen, Federal Republic of Germany, 1981.  
(b) Sheldrick, G. M. *Acta Cryst.* **2008**, *A64*, 112-122.
- (6) Jaguar 7.5, Schrödinger, LLC, New York, NY 2008.
- (7) (a) Becke, A. D. *J. Chem. Phys.* **1993**, *98*, 5648-5652.  
(b) Becke, A. D. *Phys. Rev. A* **1988**, *38*, 3098-3100.  
(c) Lee, C. T.; Yang, W. T.; Parr, R. G. *Phys. Rev. B* **1988**, *37*, 785-789.  
(d) Vosko, S. H.; Wilk, L.; Nusair, M. *Can. J. Phys.* **1980**, *58*, 1200-1211.  
(e) Slater, J. C. *Quantum Theory of Molecules and Solids, Vol. 4: The Self-Consistent Field for Molecules and Solids*; McGraw-Hill: New York, 1974.

- (8) (a) Hay, P. J.; Wadt, W. R. *J. Chem. Phys.* **1985**, *82*, 270-283.  
(b) Wadt, W. R.; Hay, P. J. *J. Chem. Phys.* **1985**, *82*, 284-298.  
(c) Hay, P. J.; Wadt, W. R. *J. Chem. Phys.* **1985**, *82*, 299-310.
- (9) (a) Hall, M. B.; Fenske, R. F. *Inorg. Chem.* **1972**, *11*, 768-775.  
(b) Bursten, B. E.; Jensen, J. R.; Fenske, R. F. *J. Chem. Phys.* **1978**, *68*, 3320-3321.  
(c) Manson, J.; Webster, C. E.; Pérez, L. M.; Hall, M. B.  
<http://www.chem.tamu.edu/jimp2/index.html>
- (10) Version 2.0, June 1993; Lichtenberger, D. L. Department of Chemistry, University of Arizona, Tuscon, AZ 85721.
- (11) Schüdel, H.; Näther, C.; Bock, H, *Acta Cryst.* **1995**, *C51*, 1841-1844.
- (12)  $^1\text{H}$  NMR of  $[\text{Me}_3\text{PPh}]\text{I}$  ( $\text{D}_2\text{O}$ ): 2.21 [d,  $^2J_{\text{P-H}} = 15$ , 9H of  $\underline{\text{Me}_3\text{P}}$ ], 7.73 [m, 2H of  $\underline{\text{PPh}}$ ], 7.84 [m, 1H of  $\underline{\text{PPh}}$ ], 7.90 [m, 2H of  $\underline{\text{PPh}}$ ].  $^{31}\text{P}\{^1\text{H}\}$  NMR of  $[\text{Me}_3\text{PPh}]\text{I}$  ( $\text{D}_2\text{O}$ ): 21.2 [s, 1P of  $\text{Me}_3\text{PPh}$ ].
